# Supplementary material
Source: HighWire-hosted journal article supplement (https://cmaj.ca/highwire/filestream/78831/field_highwire_adjunct_files/1/201967-guide-2-at.pdf)
Supplement: 201967-guide-2-at.pdf [file 201967-guide-2-at.pdf]

**Appendix 2: Analytical Framework**

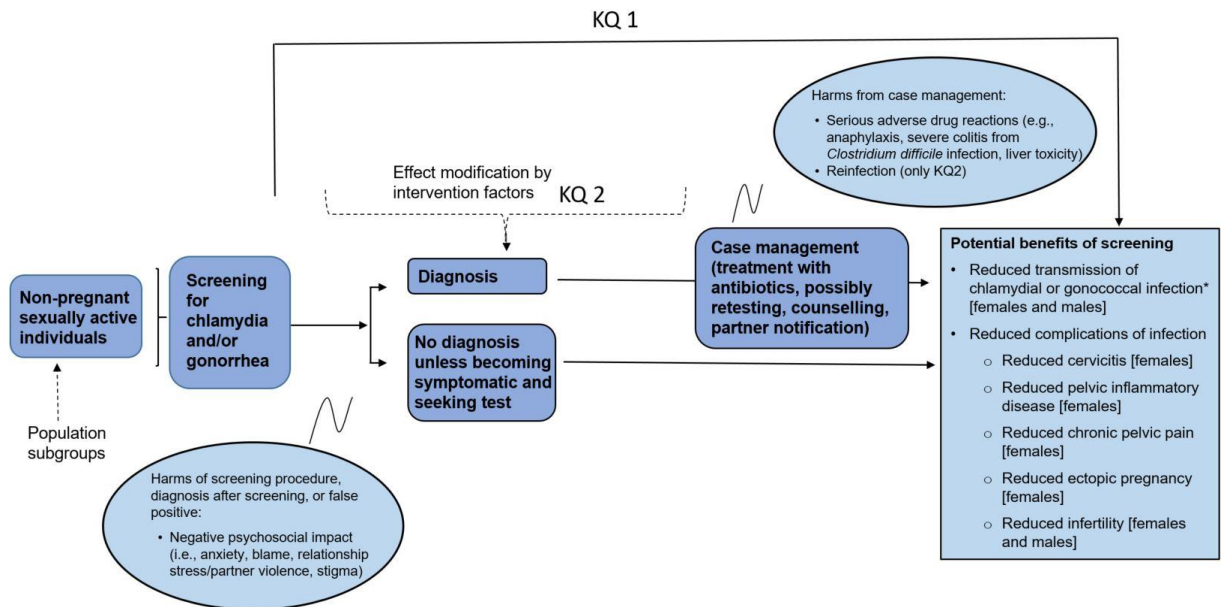

KQ1: What is the effectiveness of screening compared with no screening for chlamydia and/or gonorrhoea in non-pregnant sexually active individuals?

KQ2: What is the comparative effectiveness of different screening approaches for chlamydia and/or gonorrhoea in non-pregnant sexually active individuals?

KQ3: What is the relative importance that people place on the potential outcomes from screening for chlamydia and/or gonorrhoea?

\*For transmission, a hierarchy of evidence was considered: i) incidence of infections, ii) prevalence of infections, and iii) index case management.
